# Supplementary material
Source: HighWire-hosted journal article supplement (https://www.cmajopen.ca/highwire/filestream/90172/field_highwire_adjunct_files/4/open-2022-01210-original-submission.pdf)
Supplement: open-2022-01210-original-submission.pdf [file open-2022-01210-original-submission.pdf]

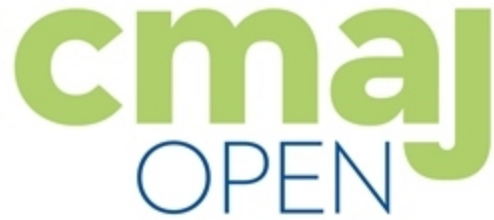

**Dissemination and Implementation of Clinical Practice Guidelines: A Longitudinal Evaluation of the Canadian Task Force on Preventive Health Care Knowledge Translation Efforts**

|                               |                                                                                                                                                                                                                                                                                                                                                                                                                                                                                                                                                                                                                                                                                                                                                                                                                                                                                                                                                                                                                                                                                                                                                                                                                                                                                                                                                            |
|-------------------------------|------------------------------------------------------------------------------------------------------------------------------------------------------------------------------------------------------------------------------------------------------------------------------------------------------------------------------------------------------------------------------------------------------------------------------------------------------------------------------------------------------------------------------------------------------------------------------------------------------------------------------------------------------------------------------------------------------------------------------------------------------------------------------------------------------------------------------------------------------------------------------------------------------------------------------------------------------------------------------------------------------------------------------------------------------------------------------------------------------------------------------------------------------------------------------------------------------------------------------------------------------------------------------------------------------------------------------------------------------------|
| Journal:                      | <i>CMAJ Open</i>                                                                                                                                                                                                                                                                                                                                                                                                                                                                                                                                                                                                                                                                                                                                                                                                                                                                                                                                                                                                                                                                                                                                                                                                                                                                                                                                           |
| Manuscript ID                 | CMAJOpen-2022-0121                                                                                                                                                                                                                                                                                                                                                                                                                                                                                                                                                                                                                                                                                                                                                                                                                                                                                                                                                                                                                                                                                                                                                                                                                                                                                                                                         |
| Manuscript Type:              | Qualitative                                                                                                                                                                                                                                                                                                                                                                                                                                                                                                                                                                                                                                                                                                                                                                                                                                                                                                                                                                                                                                                                                                                                                                                                                                                                                                                                                |
| Date Submitted by the Author: | 26-May-2022                                                                                                                                                                                                                                                                                                                                                                                                                                                                                                                                                                                                                                                                                                                                                                                                                                                                                                                                                                                                                                                                                                                                                                                                                                                                                                                                                |
| Complete List of Authors:     | <p>Fahim, Christine; St Michael's Hospital Li Ka Shing Knowledge Institute, Knowledge Translation Program<br/>         Prashad , Anupa ; St Michael's Hospital Li Ka Shing Knowledge Institute, Knowledge Translation Program<br/>         Silveira, Kyle; St Michael's Hospital Li Ka Shing Knowledge Institute, Knowledge Translation Program<br/>         Chandraraj, Arthana; St Michael's Hospital Li Ka Shing Knowledge Institute<br/>         Thombs, Brett; Jewish General Hospital, Lady Davis Institute for Medical Research; McGill University, Faculty of Medicine<br/>         Tonelli, Marcello; University of Calgary,<br/>         Theriault, Guylene; McGill University, Family medicine<br/>         Grad, Roland; McGill University, Department of Medicine<br/>         Riva, John; McMaster University, Department of Family Medicine<br/>         Colquhoun, Heather; University of Toronto, Department of Occupational Science and Occupational Therapy<br/>         Rodin, Rachel; Public Health Agency of Canada<br/>         Subnath, Melissa; Public Health Agency of Canada<br/>         Rolland-Harris, Elizabeth; Public Health Agency of Canada<br/>         Barnhardt, Kim; Canadian Medical Association, Canadian Medical Association Journal<br/>         Straus, Sharon Elizabeth; St. Michael's Hospital, Medicine</p> |
| Keywords:                     | Clinical Practice Guidelines, Family medicine, general practice, primary care, Knowledge translation                                                                                                                                                                                                                                                                                                                                                                                                                                                                                                                                                                                                                                                                                                                                                                                                                                                                                                                                                                                                                                                                                                                                                                                                                                                       |
| More Detailed Keywords:       | Preventive Health Care, Dissemination                                                                                                                                                                                                                                                                                                                                                                                                                                                                                                                                                                                                                                                                                                                                                                                                                                                                                                                                                                                                                                                                                                                                                                                                                                                                                                                      |
| Abstract:                     | <p>Background: The Canadian Task Force on Preventive Health Care (CTFPHC) develops evidence-based preventive health care guidelines for primary care practitioners. Knowledge translation (KT) tools and strategies are created for each guideline to facilitate dissemination and implementation. We report a longitudinal evaluation from 2014-2020 of</p>                                                                                                                                                                                                                                                                                                                                                                                                                                                                                                                                                                                                                                                                                                                                                                                                                                                                                                                                                                                               |

1  
2  
3  
4  
5  
6  
7  
8  
9  
10  
11  
12  
13  
14  
15  
16  
17  
18  
19  
20  
21  
22  
23  
24  
25  
26  
27  
28  
29  
30  
31  
32  
33  
34  
35  
36  
37  
38  
39  
40  
41  
42  
43  
44  
45  
46  
47  
48  
49  
50  
51  
52  
53  
54  
55  
56  
57  
58  
59  
60

|  |                                                                                                                                                                                                                                                                                                                                                                                                                                                                                                                                                                                                                                                                                                                                                                                                                                                                                                                                                                                                                                                                                                                                                                                                                                                                                                                                                                                                                                                                                                                                                                               |
|--|-------------------------------------------------------------------------------------------------------------------------------------------------------------------------------------------------------------------------------------------------------------------------------------------------------------------------------------------------------------------------------------------------------------------------------------------------------------------------------------------------------------------------------------------------------------------------------------------------------------------------------------------------------------------------------------------------------------------------------------------------------------------------------------------------------------------------------------------------------------------------------------------------------------------------------------------------------------------------------------------------------------------------------------------------------------------------------------------------------------------------------------------------------------------------------------------------------------------------------------------------------------------------------------------------------------------------------------------------------------------------------------------------------------------------------------------------------------------------------------------------------------------------------------------------------------------------------|
|  | <p>CTFPHC dissemination and implementation efforts to determine practitioners' knowledge and awareness of guidelines and KT tools and barriers and facilitators to use of these guidelines and tools.</p> <p>Methods: Annual evaluations using surveys and interviews with primary care providers were conducted from 2014-2020 to assess practitioners' knowledge and awareness and determinants of use of CTFPHC guidelines and tools. Interviews were transcribed verbatim and double coded using a framework analysis approach.</p> <p>Results: A total of 1284 primary care practitioners completed surveys and 183 participated in interviews. On average, 79.9% of participants were aware of the 7 cancer screening guidelines, 36.2% were aware of the other 6 screening guidelines and 18.6% were aware of the 3 lifestyle/prevention guidelines. Thirteen barriers and seven facilitators to guideline and tool implementation were identified; these were consistent over time. Participants identified strategies at the public/patient, provider, and health systems levels to improve uptake of guidelines.</p> <p>Interpretation: Canadian primary care practitioners were more aware of CTFPHC cancer screening guidelines compared to its other preventive health guidelines. Barriers to guideline uptake including misalignment with patient preferences and other provincial or specialty guideline organizations were consistently reported over a six-year period. Further evaluations will assess tailored strategies to the barriers identified.</p> |
|  |                                                                                                                                                                                                                                                                                                                                                                                                                                                                                                                                                                                                                                                                                                                                                                                                                                                                                                                                                                                                                                                                                                                                                                                                                                                                                                                                                                                                                                                                                                                                                                               |

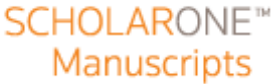

## COREQ (COnsolidated criteria for REporting Qualitative research) Checklist

A checklist of items that should be included in reports of qualitative research. You must report the page number in your manuscript where you consider each of the items listed in this checklist. If you have not included this information, either revise your manuscript accordingly before submitting or note N/A.

| Topic                                          | Item No. | Guide Questions/Description                                                                                                                              | Reported on Page No. |
|------------------------------------------------|----------|----------------------------------------------------------------------------------------------------------------------------------------------------------|----------------------|
| <b>Domain 1: Research team and reflexivity</b> |          |                                                                                                                                                          |                      |
| <i>Personal characteristics</i>                |          |                                                                                                                                                          |                      |
| Interviewer/facilitator                        | 1        | Which author/s conducted the interview or focus group?                                                                                                   |                      |
| Credentials                                    | 2        | What were the researcher's credentials? E.g. PhD, MD                                                                                                     |                      |
| Occupation                                     | 3        | What was their occupation at the time of the study?                                                                                                      |                      |
| Gender                                         | 4        | Was the researcher male or female?                                                                                                                       |                      |
| Experience and training                        | 5        | What experience or training did the researcher have?                                                                                                     |                      |
| <i>Relationship with participants</i>          |          |                                                                                                                                                          |                      |
| Relationship established                       | 6        | Was a relationship established prior to study commencement?                                                                                              |                      |
| Participant knowledge of the interviewer       | 7        | What did the participants know about the researcher? e.g. personal goals, reasons for doing the research                                                 |                      |
| Interviewer characteristics                    | 8        | What characteristics were reported about the interviewer/facilitator? e.g. Bias, assumptions, reasons and interests in the research topic                |                      |
| <b>Domain 2: Study design</b>                  |          |                                                                                                                                                          |                      |
| <i>Theoretical framework</i>                   |          |                                                                                                                                                          |                      |
| Methodological orientation and Theory          | 9        | What methodological orientation was stated to underpin the study? e.g. grounded theory, discourse analysis, ethnography, phenomenology, content analysis |                      |
| <i>Participant selection</i>                   |          |                                                                                                                                                          |                      |
| Sampling                                       | 10       | How were participants selected? e.g. purposive, convenience, consecutive, snowball                                                                       |                      |
| Method of approach                             | 11       | How were participants approached? e.g. face-to-face, telephone, mail, email                                                                              |                      |
| Sample size                                    | 12       | How many participants were in the study?                                                                                                                 |                      |
| Non-participation                              | 13       | How many people refused to participate or dropped out? Reasons?                                                                                          |                      |
| <i>Setting</i>                                 |          |                                                                                                                                                          |                      |
| Setting of data collection                     | 14       | Where was the data collected? e.g. home, clinic, workplace                                                                                               |                      |
| Presence of non-participants                   | 15       | Was anyone else present besides the participants and researchers?                                                                                        |                      |
| Description of sample                          | 16       | What are the important characteristics of the sample? e.g. demographic data, date                                                                        |                      |
| <i>Data collection</i>                         |          |                                                                                                                                                          |                      |
| Interview guide                                | 17       | Were questions, prompts, guides provided by the authors? Was it pilot tested?                                                                            |                      |
| Repeat interviews                              | 18       | Were repeat interviews carried out? If yes, how many?                                                                                                    |                      |
| Audio/visual recording                         | 19       | Did the research use audio or visual recording to collect the data?                                                                                      |                      |
| Field notes                                    | 20       | Were field notes made during and/or after the interview or focus group?                                                                                  |                      |
| Duration                                       | 21       | What was the duration of the interviews or focus group?                                                                                                  |                      |
| Data saturation                                | 22       | Was data saturation discussed?                                                                                                                           |                      |
| Transcripts returned                           | 23       | Were transcripts returned to participants for comment and/or                                                                                             |                      |

| Topic                                  | Item No. | Guide Questions/Description                                                                                                        | Reported on Page No. |
|----------------------------------------|----------|------------------------------------------------------------------------------------------------------------------------------------|----------------------|
|                                        |          | correction?                                                                                                                        |                      |
| <b>Domain 3: analysis and findings</b> |          |                                                                                                                                    |                      |
| <i>Data analysis</i>                   |          |                                                                                                                                    |                      |
| Number of data coders                  | 24       | How many data coders coded the data?                                                                                               |                      |
| Description of the coding tree         | 25       | Did authors provide a description of the coding tree?                                                                              |                      |
| Derivation of themes                   | 26       | Were themes identified in advance or derived from the data?                                                                        |                      |
| Software                               | 27       | What software, if applicable, was used to manage the data?                                                                         |                      |
| Participant checking                   | 28       | Did participants provide feedback on the findings?                                                                                 |                      |
| <i>Reporting</i>                       |          |                                                                                                                                    |                      |
| Quotations presented                   | 29       | Were participant quotations presented to illustrate the themes/findings?<br>Was each quotation identified? e.g. participant number |                      |
| Data and findings consistent           | 30       | Was there consistency between the data presented and the findings?                                                                 |                      |
| Clarity of major themes                | 31       | Were major themes clearly presented in the findings?                                                                               |                      |
| Clarity of minor themes                | 32       | Is there a description of diverse cases or discussion of minor themes?                                                             |                      |

Developed from: Tong A, Sainsbury P, Craig J. Consolidated criteria for reporting qualitative research (COREQ): a 32-item checklist for interviews and focus groups. *International Journal for Quality in Health Care*. 2007. Volume 19, Number 6: pp. 349 – 357

**Once you have completed this checklist, please save a copy and upload it as part of your submission. DO NOT include this checklist as part of the main manuscript document. It must be uploaded as a separate file.**

1  
2 **Dissemination and Implementation of Clinical Practice Guidelines: A Longitudinal Evaluation of**  
3 **the Canadian Task Force on Preventive Health Care Knowledge Translation Efforts**  
4  
5

6 Christine Fahim PhD MSc<sup>1</sup>, Anupa (Jyoti) Prashad MSc<sup>1</sup>, Kyle Silveira MPH<sup>1</sup>, Arthana Chandraraj  
7  
8 HBS<sup>1</sup>, Brett D. Thombs PhD<sup>2,3</sup>, Marcello Tonelli MD SM<sup>4</sup>, Guylene Theriault MD CCFP<sup>2</sup>, Roland  
9  
10 Grad MD CM MSc FCFP<sup>5</sup>, John Riva DC PhD<sup>6</sup>, Heather Colquhoun PhD OT Reg. (Ont.)<sup>7</sup>, Rachel  
11  
12 Rodin MD MPH<sup>8</sup>, Melissa Subnath MSc<sup>8</sup>, Elizabeth Rolland-Harris MSc PhD<sup>8</sup>, Kim Barnhardt HBA<sup>9</sup>,  
13  
14 Sharon E. Straus MD MSc<sup>1,10</sup>  
15  
16

17  
18 Affiliations  
19

20 <sup>1</sup> Knowledge Translation Program, Li Ka Shing Knowledge Institute, St. Michael's Hospital, 209  
21  
22 Victoria St, Toronto, ON, M5B 1T8, Canada  
23  
24

25 <sup>2</sup>Faculty of Medicine, McGill University, 3605 de la Montagne, Montreal QC, H3G 2M1, Canada  
26  
27

28 <sup>3</sup>Lady Davis Institute for Medical Research, Jewish General Hospital, 755 Chem. de la Côte-Sainte-  
29  
30 Catherine, Montreal QC, H3T 1E2, Canada  
31  
32

33  
34 <sup>4</sup>University of Calgary, Cumming School of Medicine, 2500 University Dr NW, Calgary AB, T2N 1N4,  
35  
36 Canada  
37  
38

39 <sup>5</sup>Department of Medicine, McGill University, 5858, chemin de la Côte-des-Neiges, Montreal QC, H3S  
40  
41 1Z1, Canada  
42  
43

44  
45 <sup>6</sup>Department of Family Medicine, McMaster University, 1280 Main Street West, Hamilton ON, L8S  
46  
47 4K1, Canada  
48  
49

50 <sup>7</sup>Department of Occupational Science and Occupational Therapy, University of Toronto, 160 - 500  
51  
52 University Ave, Toronto, ON, M5G 1V7, Canada  
53  
54

55  
56 <sup>8</sup>Public Health Agency of Canada, 785 Carling Avenue, Ottawa, ON, K1A 0K9, Canada  
57  
58

<sup>9</sup> Canadian Medical Association Journal (CMAJ), 1410 Blair Towers Place, Ottawa, ON, K1J 9B9

<sup>10</sup> Department of Medicine, Faculty of Medicine, University of Toronto, 1 King's College Circle,  
Medical Sciences Building, Toronto, ON, M5S 1A8, Canada

**Corresponding Author:**

Christine Fahim

Li Ka Shing Knowledge Institute, Unity Health Toronto

[Christine.fahim@unityhealth.to](mailto:Christine.fahim@unityhealth.to)

**Contributor's Statement:**

All authors contributed to the design, conduct and interpretation of the study; SES conceptualized, designed and interpreted the study; CF, AP, KS, AC, SES conducted the analysis; CF, AP, KS, AC, SES drafted the manuscript and all authors revised it critically. All authors gave approval for the manuscript to be published.

**Funding Statement:**

Sharon Straus and Brett D. Thombs hold Tier 1 Canada Research Chairs. The KT Program, Unity Health Toronto (Fahim, Prashad, Silveira, Chandraraj, Straus) and Barnhardt are contracted by the CTFPHC to conduct knowledge translation work. The CTFPHC is funded by the Public Health Agency of Canada.

**Declaration of Author(s) competing interest:**

The KT Program, Unity Health Toronto (Fahim, Prashad, Silveira, Chandraraj, Straus) and Barnhardt are contracted by the CTFPHC to conduct all knowledge translation work. Thombs, Tonelli, Theriault, Grad, Riva, Colquhoun are members of the CTFPHC. The CTFPHC is funded by the Public Health Agency of Canada.

1  
2 Abstract  
3

4 **Background:** The Canadian Task Force on Preventive Health Care (CTFPHC) develops evidence-based  
5 preventive health care guidelines for primary care practitioners. Knowledge translation (KT) tools and  
6 strategies are created for each guideline to facilitate dissemination and implementation. We report a  
7 longitudinal evaluation from 2014-2020 of CTFPHC dissemination and implementation efforts to  
8 determine practitioners' knowledge and awareness of guidelines and KT tools and barriers and  
9 facilitators to use of these guidelines and tools.  
10  
11  
12  
13  
14  
15  
16  
17  
18

19 **Methods:** Annual evaluations using surveys and interviews with primary care providers were conducted  
20 from 2014-2020 to assess practitioners' knowledge and awareness and determinants of use of CTFPHC  
21 guidelines and tools. Interviews were transcribed verbatim and double coded using a framework analysis  
22 approach.  
23  
24  
25  
26  
27  
28

29 **Results:** A total of 1284 primary care practitioners completed surveys and 183 participated in  
30 interviews. On average, 79.9% of participants were aware of the 7 cancer screening guidelines, 36.2%  
31 were aware of the other 6 screening guidelines and 18.6% were aware of the 3 lifestyle/prevention  
32 guidelines. Thirteen barriers and seven facilitators to guideline and tool implementation were identified;  
33 these were consistent over time. Participants identified strategies at the public/patient, provider, and  
34 health systems levels to improve uptake of guidelines.  
35  
36  
37  
38  
39  
40  
41  
42

43 **Interpretation:** Canadian primary care practitioners were more aware of CTFPHC cancer screening  
44 guidelines compared to its other preventive health guidelines. Barriers to guideline uptake including  
45 misalignment with patient preferences and other provincial or specialty guideline organizations were  
46 consistently reported over a six-year period. Further evaluations will assess tailored strategies to the  
47 barriers identified.  
48  
49  
50  
51  
52  
53  
54  
55  
56  
57  
58  
59  
60

1  
2  
3  
4  
5  
6  
7  
8  
9  
10  
11  
12  
13  
14  
15  
16  
17  
18  
19  
20  
21  
22  
23  
24  
25  
26  
27  
28  
29  
30  
31  
32  
33  
34  
35  
36  
37  
38  
39  
40  
41  
42  
43  
44  
45  
46  
47  
48  
49  
50  
51  
52  
53  
54  
55  
56  
57  
58  
59  
60

Keywords

Clinical Practice Guideline; Preventive Health Care; Primary Care; Knowledge Translation

Abbreviations

KT Knowledge Translation  
Task Force Canadian Task Force on Preventive Health Care

Confidential



## Introduction

Using evidence-based guidelines in practice is challenging. [1-3] Knowledge translation (KT) is the science and practice of using evidence in practice and policy. [4] Effective KT enables evidence-informed decision making, improved patient outcomes, and health system efficiency.[4] Evaluations of KT efforts are warranted to promote increased uptake of evidence-based guidelines.

The Canadian Task Force on Preventive Health Care (CTFPHC) was reconstituted in 2009 by the Public Health Agency of Canada (PHAC) to develop preventive health care guidelines, with the aim of supporting primary care practitioners and patients in practice and decision making. [5-7] The CTFPHC comprises 15 primary care and prevention experts from Canada including family physicians, specialist physicians, allied health professionals and methodologists and is supported by knowledge synthesis, guideline development, and KT methods experts. CTFPHC members are not paid for their contributions and a conflict of interest policy [8] is adopted by all CTFPHC members, content experts, peer reviewers, evidence centers, and KT experts. Since 2011, the CTFPHC has released over 20 guidelines on prevention and screening of cancer, chronic health and other conditions. The CTFPHC uses rigorous methods to identify evidence and develop recommendations.[9] Input from clinical experts, peer reviewers, and stakeholders (including practitioners and patients or the public) is included in guideline and KT tool development.[10] KT tools (resources to support guideline use) are created for each guideline.[10] The KT Program of St. Michael's Hospital conducts an annual evaluation of the CTFPHC dissemination and implementation methods to assess primary care practitioners' engagement with CTFPHC guidelines.

Our objectives were to (1) *assess the level of awareness of the CTFPHC guidelines among primary care practitioners from 2014-2020*; (2) *identify facilitators and barriers to implementation of CTFPHC guidelines and KT tools*; and (3) *identify strategies to improve the uptake of CTFPHC guidelines*.

## Methods

1  
2 *Study design:* Annual evaluations of CTFPHC activities were conducted between 2014-2020 using  
3  
4 surveys and key informant interviews. Interviews and surveys were conducted and reported using the  
5  
6 Consolidated criteria for reporting qualitative studies (COREQ) [11] and the Checklist of Selected  
7  
8 Reporting Guidelines for Surveys, [12] respectively.  
9

10  
11 *Setting and Context:* Evaluations were conducted nationally. CTFPHC guidelines and accompanying KT  
12  
13 tools are disseminated using methods that include publications, presentations, direct distribution (e.g.,  
14  
15 conferences), media, social media (e.g., Twitter, websites, YouTube videos, podcasts), and webinars.  
16  
17 The annual evaluation occurs from January to March to measure the impact of the CTFPHC guidelines  
18  
19 and KT tools from January to December of the preceding year (Appendix A). Each evaluation focuses  
20  
21 on the guidelines and associated KT tools published that year, and on guidelines that recommended a  
22  
23 substantial change in practice from previous years. The annual evaluations included assessment of 16  
24  
25 CTFPHC guidelines published between 2011-2020 (Table 1). Seven guidelines focused on cancer  
26  
27 screening, three focused on lifestyle and prevention (e.g., obesity, smoking), and six were categorized as  
28  
29 ‘other screening’ (e.g., cognitive impairment). A total of 38 KT tools were developed with a range of 1-  
30  
31 10 tools per guideline. Cancer screening guidelines, specifically two breast cancer screening guidelines,  
32  
33 had the greatest number of KT tools (n=29 total; n=10 for breast cancer). Cancer screening guidelines  
34  
35 included patient- and clinician-facing KT tools while other guidelines included clinician-facing KT tools  
36  
37 only.  
38  
39  
40  
41  
42

43 The KT Program conducted annual evaluations of the CTFPHC and did not have any relationships with  
44  
45 the evaluation participants.  
46

47  
48 *Participant recruitment:* Each year, we recruited primary care practitioners, including primary care  
49  
50 physicians and nurse practitioners, to participate through advertisements promoted via CTFPHC  
51  
52 communication channels (e.g., newsletter, Twitter, website). Recruitment advertisements were  
53  
54 disseminated via other organizations (e.g., Canadian Medical Association, Canadian Medical  
55  
56  
57  
58  
59  
60

1 Association Journal, Canadian Family Physician Journal) using electronic newsletters, emails, and social  
2 media messages. Participants were also recruited from the CTFPHC interview and survey listserv. The  
3 listserv includes a database of emails from primary care practitioners who participated in previous  
4 CTFPHC KT activities and demonstrated interest in being contacted to participate in future projects.  
5 From 2014-2019, we also recruited practitioners to participate in a shortened evaluation survey at the  
6 Family Medicine Forum conference, Canada's largest annual conference for family physicians. This  
7 latter strategy was not done in 2020 because the conference was held virtually due to COVID-19.  
8 Survey respondents were invited to participate in an interview. We aimed to include a sample of  
9 interview participants that was representative of the Canadian primary practitioner population regarding  
10 demographics (e.g., age, gender, language), province/territory, and years in practice. To enhance  
11 participation, survey participants were entered into a draw to win an iPad. Interview participants were  
12 compensated \$100 and were not eligible for the draw.

13 *Surveys:* Surveys were designed using the Theoretical Domains Framework [13,14] to assess  
14 participants' awareness of, barriers and facilitators to use of CTFPHC guidelines, as well as self-  
15 reported use of the guidelines and KT tools. Each year, participants were asked about newly released  
16 CTFPHC guidelines and the CTFPHC's most popular guidelines. The most popular guidelines were  
17 selected by media impressions and website analytics and included breast, colorectal and prostate cancer  
18 screening guidelines. Survey items included multiple choice, Likert-scale, and open-ended questions.  
19 Each year, surveys were piloted for clarity with primary care physicians prior to use. Surveys were  
20 administered in English (2014-2020) and French (2019-2020) using an online survey platform  
21 (Qualtrics). Surveys were accessible for 4 weeks and required 20-30 minutes to complete. Survey  
22 responses were anonymous.

23 *Interviews:* Experienced KT Program researchers conducted the key informant interviews in English.  
24 Key informant interviews used a descriptive qualitative approach [15] to build on survey findings.

1 Survey data were used to identify interview questions to probe for further detail. A semi-structured  
2 interview guide (Appendix B) was used to assess participants' perceptions and use of CTFPHC  
3 guidelines, barriers and facilitators to guideline and KT tool use, and suggestions on how to improve  
4 uptake of CTFPHC guidelines. One hour interviews were conducted by telephone or teleconference  
5 computer software. Following participant consent, interviews were recorded and transcribed verbatim.  
6  
7  
8  
9  
10  
11  
12  
13 Interviewing continued each year until data saturation was reached.

14  
15 *Data Analysis:* Survey data were analyzed in SPSS to generate descriptive statistics. Overall mean  
16 awareness scores for guidelines categories (e.g., cancer screening guidelines) were calculated by  
17 averaging awareness scores for each year. Using thematic analysis, a coding framework was generated  
18 using a sample of five interviews to start and was iteratively updated to reflect the interview data.  
19  
20  
21  
22  
23  
24  
25  
26  
27  
28  
29  
30  
31  
32  
33  
34  
35  
36  
37  
38  
39  
40  
41  
42  
43  
44  
45  
46  
47  
48  
49  
50  
51  
52  
53  
54  
55  
56  
57  
58  
59  
60  
*Researchers leading the interviews reflected on their biases and positions on guideline dissemination and  
evaluation as part of the coding process. The same coding structure was used for each annual evaluation,  
using the previous years' coding framework as a base codebook. Interview data were double-coded by  
two experienced KT Program researchers using a framework analysis approach on NVIVO qualitative  
software. Coders targeted an inter-rater agreement of >0.65. Discrepancies were discussed until  
consensus was reached. Themes were derived from the coded data and coded using the Theoretical  
Domains Framework. [13,14]*

*Outcomes:* The overall evaluation focused on awareness of CTFPHC guidelines, barriers and facilitators  
to use of CTFPHC guidelines and KT tools and participants' suggested strategies to improve uptake of  
CTFPHC guidelines among primary care practitioners.

*Ethics Approval:* This study received REB approval from the Unity Health Toronto Research Ethics  
Office (REB# 17-372).

## Results

### *Characteristics of Study Participants*

1 A total of 1284 practitioners contributed to the surveys and 183 of them participated in interviews  
2  
3  
4 between 2014 and 2020. Sixty-seven percent of participants were female and 61% were in practice for  
5  
6 1-10 years at time of participation. Participants from Ontario comprised 47% of the sample (n=689).  
7  
8 Approximately 58% of participants worked in urban regions (n=842), 59% in community-based, and  
9  
10 27% in multipractitioner clinics (n=668). Table 2 provides details of participant characteristics.  
11

### 12 ***Awareness of Guidelines***

13  
14  
15 Survey data indicated that awareness of cancer screening guidelines ranged from 27-93%; mean  
16  
17 awareness scores for cancer screening guidelines was 80% (Table 3). On average, 81% of participants  
18  
19 reported being aware of both breast cancer guidelines, 87% being aware of cervical cancer and 82%  
20  
21 being aware of prostate cancer guidelines. Only 27% of participants were aware of the 2020 esophageal  
22  
23 adenocarcinoma guideline. Forty-seven percent of participants were aware of the 2018 breast cancer  
24  
25 guideline update in its year of release (the survey was conducted in January 2019 and the guideline was  
26  
27 released in December 2018), however awareness rose to 84% the following year. Awareness of  
28  
29 lifestyle/prevention guidelines ranged from 16-22% (mean awareness = 18%) and for other guidelines  
30  
31 ranged from 17-62% (mean awareness = 36%).  
32  
33  
34  
35

### 36 ***Barriers and Facilitators impacting guideline uptake***

37  
38 The most commonly reported barrier to CTFPHC guideline implementation was a perceived  
39  
40 misalignment of the guideline recommendation with patient expectations or preferences. (Table 4)  
41  
42 Misalignment of the guideline with other provincial or specialty guidelines, perceptions of evidence  
43  
44 strength (e.g., of CTFPHC or weakness of recommendation) and lack of consensus among healthcare  
45  
46 practitioners on guideline recommendations were also commonly reported barriers over the evaluation  
47  
48 period. Additional barriers included misalignment of CTFPHC recommendations with provincial or  
49  
50 territorial health care coverage or fee-for-service billing scheme, out of date guidelines, time constraints  
51  
52 to implementing guideline recommendations (e.g. given that annual preventive health exams are no  
53  
54  
55  
56  
57  
58  
59  
60

1 longer recommended, some practitioners stated that they had less opportunity to engage with patients in  
2 discussions around preventive health care), complexity of guideline (e.g. a lack of support on how to  
3 implement recommendations), and lack of awareness of the guideline or KT tools.  
4  
5  
6  
7

8 Facilitators to use guidelines were the converse of the reported barriers. Specifically:  
9

10 availability/awareness of updated guidelines and tools, public/patient awareness of guideline  
11 recommendations, consensus among health care providers/colleagues on recommendations, ease of  
12 guideline use and strength of guideline evidence were identified as facilitators. The integration of  
13 guidelines into electronic prompts, EMR reminders and/or mobile apps for patients was the most  
14 commonly reported facilitator (Table 4). Additionally, financial incentives for screening were reported  
15 as a facilitator; this was not a common theme, reported only in 2014 and 2019.  
16  
17  
18  
19  
20  
21  
22  
23

#### 24 ***Participants' suggested strategies to improve uptake of CTFPHC guidelines***

25 A number of strategies to overcome barriers and leverage facilitators to improve guideline uptake were  
26 suggested by participants. These are presented in Box 1. These were categorized as strategies to raise  
27 public/patient awareness of and buy-in for CTFPHC guidelines, promote practitioner awareness/use of  
28 CTFPHC guidelines, and overcome health system constraints to implementing guideline  
29 recommendations.  
30  
31  
32  
33  
34  
35  
36  
37

#### 38 **Interpretation**

39 This study presents the first longitudinal evaluation of KT efforts of the CTFPHC. Over a 6-year study  
40 period, our findings suggest that primary care practitioners are most familiar with cancer screening  
41 guidelines, particularly for breast, cervical and prostate cancers. Familiarity with other preventive health  
42 guidelines varied, with participant awareness of other CTFPHC guidelines ranging from 17-62%. The  
43 timeline between the release of the guidelines and when the evaluation survey was conducted may have  
44 influenced awareness such as with the 2019 survey (guideline was released in late 2018). The breast,  
45 cervical and prostate cancer guidelines had the greatest number of corresponding KT tools; it is possible,  
46  
47  
48  
49  
50  
51  
52  
53  
54  
55  
56  
57  
58  
59  
60

1 though unclear, whether the prevalence of KT tools increased participant awareness of these guidelines.  
2  
3  
4 Evidence exploring the effectiveness of KT tools used by guideline producers to improve uptake of  
5  
6 guidelines suggests practitioners who receive both a guideline and a corresponding tool are more likely  
7  
8 to follow guideline recommendations as compared to practitioners who receive a guideline only.[16]  
9  
10 Similarly, a Cochrane review determined that printed educational materials disseminated to healthcare  
11  
12 professionals may slightly improve healthcare professionals' practice outcomes.[17]  
13  
14 Our data provide additional insight on factors impacting Canadian practitioners' use of CTFPHC  
15  
16 guidelines. Perceived misalignment of the guideline with patient preferences was the most commonly  
17  
18 reported barrier to guideline implementation. These findings are consistent with other Canadian studies  
19  
20 [18] as well as a systematic review, [19] which suggest that practitioners perceive the application of  
21  
22 guideline recommendations to individual patients to be impractical. Given the prevalence of this barrier  
23  
24 over the past two decades, it is imperative to identify strategies to support use of guidelines alongside  
25  
26 shared decision making. Tools that support shared decision making and practical interpretation of  
27  
28 guideline recommendations may support discussion of guideline recommendations with patients. The  
29  
30 CTFPHC has recently focused on developing such tools (e.g., shared decision making tool for the 2018  
31  
32 breast cancer guideline) and work is underway to support practitioners to utilize these in practice. [20]  
33  
34 Improving efforts to include patient values and preferences in guideline development and transparency  
35  
36 about these processes may also improve guideline use. [21,22]  
37  
38  
39 Misalignment with other guidelines, perceptions of evidence strength behind guideline  
40  
41 recommendations, and lack of clarity on how to interpret guideline recommendations (particularly for  
42  
43 weak/conditional recommendations) were prevalent barriers. There is an opportunity to develop KT  
44  
45 tools to support practitioners to interpret 'weak' recommendations.[23] For instance, the 2018 CTFPHC  
46  
47 breast cancer screening guideline language changed recommendations from "weak" to "conditional"  
48  
49 depending on a woman's preferences and values around screening benefits and harms. Framing  
50  
51  
52  
53  
54  
55  
56  
57  
58  
59  
60

1 recommendations in this manner may improve clarity while emphasizing the importance of shared  
2 decision making. [23,24] Complementary shared decision making tools were also created by the  
3  
4 CTFPHC to facilitate discussions between patients and providers. [25]  
5  
6

7  
8 Participants suggested developing partnerships with professional organizations, particularly provincial  
9 and specialty guideline developers, to encourage alignment of guideline recommendations. Avoiding  
10 duplication of effort in creating guidelines on the same topics is also an issue that should be considered  
11 by various guideline developing organizations. While the CTFPHC engages relevant stakeholder groups,  
12 it does not partner with other organizations due to challenges navigating potential conflicts of interest in  
13 guideline development.  
14  
15

16  
17 Other reported barriers to guideline implementation included time constraints, complexity of guidelines,  
18 lack of awareness of guideline/corresponding tools, lack of agreement among practitioner colleagues,  
19 and lack of resources to facilitate recommendation (e.g., lung cancer screening access). These barriers  
20 are consistent with existing literature, including a recent metareview of 25 systematic reviews of barriers  
21 and facilitators to guideline implementation. [26]  
22  
23

24  
25 There exist multiple opportunities at the patient/public, provider, and health systems levels to improve  
26 uptake of preventive health guidelines. However, the impact of these strategies is unknown given the  
27 paucity of high-quality research assessing their impact. [27] There is limited literature that reports on the  
28 implementation quality or development processes of KT tools particularly with respect to preventive  
29 health guidelines. Improved reporting on strategies and testing to implement and evaluate interventions  
30 to promote guideline uptake, in partnership with key stakeholders, is warranted. [6]  
31  
32

### 33 ***Limitations***

34  
35 While we aimed to recruit a representative sample of Canadian primary care practitioners, our sample  
36 included an over-representation of female practitioners, young practitioners who were in early practice  
37 (1-5 years), and participants from Ontario (though this reflects the geographical distribution of primary  
38  
39  
40  
41  
42  
43  
44  
45  
46  
47



1 care providers in Canada). There was an underrepresentation of practitioners from rural areas, single  
2 practitioner clinics and French-speaking practitioners; therefore, it is possible the perceptions are not  
3  
4 representative of all primary care practitioners in Canada. Participants who engaged in these evaluations  
5  
6 were more likely to complete the survey or interview if they were aware of the CTFPHC; as such, our  
7  
8 findings may overestimate awareness of practitioners' awareness of CTFPHC guidelines and tools.  
9  
10 Additionally, data were based on participants' self-reported awareness and use of Task Force guidelines  
11  
12 and tools. It is possible that participants' responses were impacted by social desirability and recall  
13  
14 biases.  
15  
16  
17  
18

### 19 **Conclusion**

20 Primary care practitioners are generally aware of national cancer screening guidelines, specifically for  
21  
22 prostate, breast and cervical cancers. Knowledge of other screening and preventive health guidelines  
23  
24 vary significantly. Consistently-reported barriers to guideline uptake over six years reflect challenges  
25  
26 described in the Canadian and international literature. Opportunities to develop innovative strategies to  
27  
28 improve uptake of clinical practice guidelines and corresponding KT tools exist at the public/patient,  
29  
30 provider and health systems levels.  
31  
32  
33  
34  
35  
36  
37

### 38 **Data Sharing Statement**

39 Data from CTFPHC's annual evaluations are publicly available on the Task Force's website:  
40  
41 <https://canadiantaskforce.ca/get-involved/annual-evaluation/>. Interview and survey data are available  
42  
43 upon request.  
44  
45  
46  
47  
48  
49  
50  
51  
52  
53  
54  
55  
56  
57  
58  
59  
60

## References

1. Brownson RC, Kreuter MW, Arrington BA, True WR. Translating Scientific Discoveries into Public Health Action: How Can Schools of Public Health Move Us Forward? *Public Health Rep* (1974). 2006;121(1):97–103.
2. Rogers EM. *Diffusion of innovations*. 5th ed. New York: Free Press; 2005.
3. Morris ZS, Wooding S, Grant J. The answer is 17 years, what is the question: understanding time lags in translational research. *Journal of the Royal Society of Medicine*. 2011;104(12):510–20.
4. Straus SE, Tetroe J, Graham ID. *Knowledge Translation in Health Care*. Chichester, West Sussex, England: John Wiley & Sons; 2013 [cited July 2021]. Available from: doi:10.1002/9781118413555
5. Gagliardi AR, Brouwers MC, Palda VA, Lemieux-Charles L, Grimshaw JM. How can we improve guideline use? A conceptual framework of implementability. *Implement Sci*. 2011;6:26.
6. Moore AE, Straus SE, Kasperavicius D, Bell NR, Dickinson JA, Grad R, et al. Knowledge translation tools in preventive health care. *Can Fam Physician*. 2017 Nov;63(11):853-858.
7. Canadian Task Force on Preventive Health Care. [Internet]. [Canada]: Canadian Task Force on Preventive Health Care; c2019 [cited 2021 July]. Available from: <http://www.canadiantaskforce.ca/>
8. Schünemann HJ, Al-Ansary LA, Forland F, Kersten S, Komulainen J, Kopp IB, et al. Guidelines International Network: Principles for disclosure of interests and management of conflicts in Guidelines. *Ann Intern Med*. 2015;163: 548-553.
9. Canadian Task Force on Preventative Health. *Canadian Task Force on Preventive Health Care Procedural Manual* [Internet]. 2014 [cited 2021 July]. Available from: [https://canadiantaskforce.ca/wp-content/uploads/2016/12/procedural-manual-en\\_2014\\_Archived.pdf](https://canadiantaskforce.ca/wp-content/uploads/2016/12/procedural-manual-en_2014_Archived.pdf)
10. Canadian Task Force on Preventative Health. *Methodology* [internet]. 2020 Jan 31 [cited 2021 July]. Available from: <https://canadiantaskforce.ca/methods/>
11. Tong A, Sainsbury P, Craig J. Consolidated criteria for reporting qualitative research (COREQ): a 32-item checklist for interviews and focus groups. *International journal for quality in health care*. 2007;19(6):349–57.
12. Artino AR, Durning SJ, Sklar DP. Guidelines for Reporting Survey-Based Research Submitted to Academic Medicine. *Acad Med*. 2018;93(3):337–40.
13. Cane J, O'Connor D, Michie S. Validation of the theoretical domains framework for use in behaviour change and implementation research. *Implement Sci*. 2012;7:37; doi: 10.1186/1748-5908-7-37.
14. Michie S, Johnston M, Abraham C, Lawton R, Parker D, Walker A, et al. Making psychological theory useful for implementing evidence based practice: a consensus approach. *Qual Saf Health Care*. 2005;14:26–33; doi: 10.1136/qshc.2004.011155.
15. Sandelowski M. Whatever happened to qualitative description? *Res Nurs Health*. 2000;23(4):334–40.
16. Flodgren G, Hall AM, Goulding L, Eccles MP, Grimshaw JM, Leng GC, et al. Tools developed and disseminated by guideline producers to promote the uptake of their guidelines. *Cochrane Database Syst Rev* [Internet]. 2016; [cited on July 2021]; (8) Available from: doi: 10.1002/14651858.CD010669.pub2
17. Giguère A, Légaré F, Grimshaw J, Turcotte S, Fiander M, Grudniewicz A, et al. Printed educational materials: effects on professional practice and healthcare outcomes. *Cochrane Database Syst Rev*. 2020; doi: 10.1002/14651858.CD004398.pub4.
18. Boivin A, Légaré F, Gagnon M-P. Competing Norms: Canadian Rural Family Physicians' Perceptions of Clinical Practice Guidelines and Shared Decisionmaking. *J Health Serv Res Policy*. 2008;13(2):79–84.
19. Farquhar CM, Kofa EW, Slutsky JR. Clinicians' attitudes to clinical practice guidelines: a systematic review. *Med J Aust*. 2002;177(9):502–6.

- 1
  - 2
  - 3
  - 4
  - 5
  - 6
  - 7
  - 8
  - 9
  - 10
  - 11
  - 12
  - 13
  - 14
  - 15
  - 16
  - 17
  - 18
  - 19
  - 20
  - 21
  - 22
  - 23
  - 24
  - 25
  - 26
  - 27
  - 28
  - 29
  - 30
  - 31
  - 32
  - 33
  - 34
  - 35
  - 36
  - 37
  - 38
  - 39
  - 40
  - 41
  - 42
  - 43
  - 44
  - 45
  - 46
  - 47
  - 48
  - 49
  - 50
  - 51
  - 52
  - 53
  - 54
  - 55
  - 56
  - 57
  - 58
  - 59
  - 60
20. Grad R, Légaré F, Bell NR, Dickinson JA, Singh H, Moore AE, et al. Shared decision making in preventive health care: What it is; what it is not. *Can Fam Physician*. 2017;63(9):682–4.
21. Lang E, Bell NR, Dickinson JA, Grad R, Kasperavicius D, Moore AE, et al. Eliciting patient values and preferences to inform shared decision making in preventive screening. *Can Fam Physician*. 2018;64(1):28–31.
22. Young CE, Boyle FM, Brooker KS, Mutch AJ. Incorporating patient preferences in the management of multiple long-term conditions: is this a role for clinical practice guidelines? *J Comorb*. 2015;5(1):122–31.
23. Canadian Task Force on Preventive Health Care. Grades of Recommendation, Assessment, Development, and Evaluation [Internet]. 2011 [cited 2021 July]. Available from: <https://canadiantaskforce.ca/methods/grade/>.
24. Canadian Task Force on Preventive Health Care. Breast cancer screening: new emphasis on shared decision-making between women and their health care providers [Internet]. 2018 [cited 2021 July]. Available from: <https://canadiantaskforce.ca/breast-cancer-screening-new-emphasis-on-shared-decision-making-between-women-and-their-health-care-providers/>.
25. Canadian Task Force on Preventive Health Care. Breast Cancer Update—Shared-decision making tool, Age 40-49 [Internet]. 2020 [cited 2021 July]. [https://canadiantaskforce.ca/wp-content/uploads/2020/06/CTFPHC\\_Breast\\_Cancer\\_Shared\\_Decision\\_Making\\_Tool\\_40-49\\_Final.pdf](https://canadiantaskforce.ca/wp-content/uploads/2020/06/CTFPHC_Breast_Cancer_Shared_Decision_Making_Tool_40-49_Final.pdf)
26. Correa VC, Lugo-Agudelo LH, Aguirre-Acevedo DC, Contreras JAP, Borrero AMP, Patiño-Lugo DF, et al. Individual, health system, and contextual barriers and facilitators for the implementation of clinical practice guidelines: a systematic metareview. *Health Res Policy Syst*. 2020;18(1):74–74.
27. Flodgren G, Hall AM, Goulding L, Eccles MP, Grimshaw JM, Leng GC, et al. Tools developed and disseminated by guideline producers to promote the uptake of their guidelines. *Cochrane Database Syst Rev*. 2016; doi: 10.1002/14651858.CD010669.pub2.

Dissemination and Implementation of Clinical Practice Guidelines: A Longitudinal Evaluation of  
the Canadian Task Force on Preventive Health Care Knowledge Translation Efforts

Table 1: CTFPHC Guidelines and Knowledge Translation (KT) Tools

| Guideline                                   | Guideline release date | Associated KT tools                                                                                                                                                                                                                                                                                                                       | Year(s) assessed (via interviews, surveys) |
|---------------------------------------------|------------------------|-------------------------------------------------------------------------------------------------------------------------------------------------------------------------------------------------------------------------------------------------------------------------------------------------------------------------------------------|--------------------------------------------|
| <b>Cancer Screening Guidelines</b>          |                        |                                                                                                                                                                                                                                                                                                                                           |                                            |
| Breast Cancer                               | November 2011          | Patient algorithm<br>Patient FAQ<br>Risks & Benefits, Age 40-49<br>Risks & Benefits, Age 50-69<br>Risk & Benefits, Age 70-74                                                                                                                                                                                                              | 2014-2018                                  |
| Breast Cancer (Updated Guideline)           | December 2018          | 1000 Person Tool<br>1000 Person Tool, Age 40-49<br>1000 Person Tool, Age 50-59<br>1000 Person Tool, Age 60-69<br>1000 Person Tool, Age 70-74<br>Patient algorithm<br>Shared decision-making tool, Age 40-49<br>Shared decision-making tool, Age 50-59<br>Shared decision-making tool, Age 60-69<br>Shared decision-making tool, Age 70-74 | 2018-2020                                  |
| Cervical Cancer                             | January 2013           | Clinician algorithm<br>Clinician FAQ<br>Patient algorithm<br>Patient FAQ                                                                                                                                                                                                                                                                  | 2014-2020                                  |
| Prostate Cancer                             | November 2014          | 1000 Person Tool<br>Clinician FAQ<br>Infographic<br>Patient FAQ                                                                                                                                                                                                                                                                           | 2014-2020                                  |
| Colorectal Cancer                           | March 2016             | Clinician recommendation table<br>Patient FAQ                                                                                                                                                                                                                                                                                             | 2016                                       |
| Lung Cancer                                 | April 2016             | 1000 Person Tool<br>Clinician FAQ                                                                                                                                                                                                                                                                                                         | 2016                                       |
| Esophageal Adenocarcinoma                   | July 2020              | Clinician FAQ<br>Patient FAQ                                                                                                                                                                                                                                                                                                              | 2020                                       |
| <b>Lifestyle/ Prevention Guidelines</b>     |                        |                                                                                                                                                                                                                                                                                                                                           |                                            |
| Obesity in Children                         | April 2015             | Clinician recommendation table                                                                                                                                                                                                                                                                                                            | 2015                                       |
| Obesity in Adults                           | February 2015          | Clinician algorithm<br>Clinician FAQ                                                                                                                                                                                                                                                                                                      | 2015                                       |
| Tobacco Smoking in Children and Adolescents | February 2017          | Clinician FAQ                                                                                                                                                                                                                                                                                                                             | 2017                                       |
| <b>Other Guidelines</b>                     |                        |                                                                                                                                                                                                                                                                                                                                           |                                            |
| Cognitive Impairment                        | January 2015           | Clinician FAQ                                                                                                                                                                                                                                                                                                                             | 2016                                       |
| Developmental Delay                         | May 2016               | Clinician FAQ                                                                                                                                                                                                                                                                                                                             | 2016                                       |
| Hepatitis C                                 | April 2017             | Clinician FAQ                                                                                                                                                                                                                                                                                                                             | 2017                                       |

|                                       |               |               |            |
|---------------------------------------|---------------|---------------|------------|
| Asymptomatic Bacteriuria in Pregnancy | July 2018     | Clinician FAQ | 2018, 2019 |
| Impaired Vision                       | May 2018      | Clinician FAQ | 2018       |
| Asymptomatic Thyroid Dysfunction      | November 2019 | Clinician FAQ | 2019, 2020 |

Confidential

Table 2: Participant characteristics

|                                                                            | <b>Survey<br/>n=1284</b> | <b>Interview<br/>n=183</b> |
|----------------------------------------------------------------------------|--------------------------|----------------------------|
| <b>Gender</b>                                                              |                          |                            |
| Male                                                                       | 351 (27.3%)              | 64 (35.0%)                 |
| Female                                                                     | 855 (66.6%)              | 116 (63.3%)                |
| Non-binary                                                                 | 17 (1.3%)                | -                          |
| Prefer not to say                                                          | 116 (0.9%)               | -                          |
| Not reported                                                               | 50 (3.9%)                | 3 (1.6%)                   |
| <b>Age</b>                                                                 |                          |                            |
| 20-39                                                                      | 731 (56.9%)              | 89 (48.7%)                 |
|                                                                            |                          |                            |
| 40-59                                                                      | 407 (31.7%)              | 38 (20.7%)                 |
|                                                                            |                          |                            |
| 60-79                                                                      | 80 (6.2%)                | 7 (3.9%)                   |
|                                                                            |                          |                            |
| 80+                                                                        | 0.0                      | 0.0                        |
| Not reported                                                               | 65 (5.1%)                | 49 (26.8%)                 |
| <b>Years of practice</b>                                                   |                          |                            |
| 1 to 10                                                                    | 783 (61.0%)              | 121 (66.1%)                |
|                                                                            |                          |                            |
| 11 to 20                                                                   | 182 (14.2%)              | 28 (15.4%)                 |
|                                                                            |                          |                            |
| 21 to 30                                                                   | 140 (10.9%)              | 22 (12.0 %)                |
|                                                                            |                          |                            |
| 31 to 40                                                                   | 80 (6.2%)                | 10 (5.5%)                  |
|                                                                            |                          |                            |
| 40+                                                                        | 12 (0.9%)                | 2 (1.1%)                   |
| Not reported                                                               | 87 (6.8%)                | 0.0                        |
| <b>Region</b>                                                              |                          |                            |
| Urban                                                                      | 749 (58.3%)              | 93 (50.8%)                 |
| Suburban                                                                   | 191 (14.9%)              | 14 (7.7)                   |
| Rural                                                                      | 340 (26.5%)              | 37 (20.3%)                 |
| Not Reported                                                               | 59 (4.2%)                | 49 (26.8%)                 |
| <b>Clinic Type*</b>                                                        |                          |                            |
| Hospital based                                                             | 239 (18.6%)              | 25 (13.7%)                 |
| Community based                                                            | 758 (59.0 %)             | 98 (53.6%)                 |
| Multidisciplinary clinic                                                   | 347 (27.0 %)             | 60 (32.8%)                 |
| Not reported                                                               | 80 (6.2%)                | 49 (26.8%)                 |
| <b>Number of clinicians*</b>                                               |                          |                            |
| Single practitioner clinic                                                 | 72 (5.6%)                | 4 (2.2%)                   |
| Multipractitioner clinic<br>(physician group clinic/family<br>health team) | 582 (45.3%)              | 86 (47.1%)                 |
| Not reported                                                               | 630 (49.1%)              | 49 (26.8%)                 |
| <b>Province/Territory*</b>                                                 |                          |                            |

|                       |             |             |
|-----------------------|-------------|-------------|
| Ontario               | 606 (47.2%) | 83 (45.4%)  |
| British Columbia      | 119 (9.3%)  | 20 (11.0 %) |
| Manitoba              | 86 (6.7%)   | 10 (5.5%)   |
| Saskatchewan          | 39 (3.0%)   | 13 (7.1%)   |
| Alberta               | 110 (8.6%)  | 14 (7.7%)   |
| Quebec                | 92 (7.2%)   | 13 (7.1%)   |
| Northwest Territories | 8 (0.6%)    | 13 (7.1%)   |
| Nova Scotia           | 60 (4.7%)   | 2 (1.1%)    |
| New Brunswick         | 41 (3.2%)   | 6 (3.3%)    |
| Prince Edward Island  | 21 (1.6%)   | 9 (5.0%)    |
| Yukon                 | 1 (0.1%)    | 1 (0.5%)    |
| Newfoundland          | 30 (2.3%)   | 2 (1.1%)    |
| Not reported          | 73 (5.7%)   | 2 (1.1%)    |

\*Number of participants within a category may not add up to the total number of participants because some PCPs provided demographic characteristics for multiple clinics in which they work and some did not select certain options.

Confidential

Table 3: Survey participants' awareness of guidelines

NR – guideline not released

| Guideline                                                                               | Evaluation Year |      |      |      |      |      |              |
|-----------------------------------------------------------------------------------------|-----------------|------|------|------|------|------|--------------|
|                                                                                         | 2014            | 2015 | 2016 | 2017 | 2018 | 2019 | 2020         |
| <b><i>Cancer Screening Guidelines [% surveyed who were aware of guideline]</i></b>      |                 |      |      |      |      |      |              |
| Breast Cancer                                                                           | 85              | 89   | 91   | 90   | 75   | -    | -            |
| Breast Cancer - Update                                                                  | NR              | NR   | NR   | NR   | 47   | 84   | 90           |
| Cervical Cancer                                                                         | 88              | 89   | 93   | 89   | 82   | 83   | 87           |
| Prostate Cancer                                                                         | 77              | 81   | 83   | 88   | 81   | 84   | 82           |
| Lung Cancer                                                                             | NR              | NR   | 49   | -    | -    | -    | -            |
| Colorectal Cancer                                                                       | NR              | NR   | 84   | -    | -    | -    | -            |
| Esophageal Adenocarcinoma                                                               | NR              | NR   | NR   | NR   | NR   | NR   | 27           |
| Mean awareness score across cancer screening guidelines                                 |                 |      |      |      |      |      | <b>79.9%</b> |
| <b><i>Lifestyle/ Prevention Guidelines [% surveyed who were aware of guideline]</i></b> |                 |      |      |      |      |      |              |
| Obesity in Children                                                                     | NR              | 18   | -    | -    | -    | -    | -            |
| Obesity in Adults                                                                       | NR              | 22   | -    | -    | -    | -    | -            |
| Tobacco Smoking in Children and Adolescents                                             | NR              | NR   | NR   | 16   | -    | -    | -            |
| Mean awareness score across lifestyle prevention guidelines                             |                 |      |      |      |      |      | <b>18.6%</b> |
| <b><i>Other Guidelines [% surveyed who were aware of guideline]</i></b>                 |                 |      |      |      |      |      |              |
| Cognitive Impairment                                                                    | NR              | NR   | 24   | -    | -    | -    | -            |
| Developmental Delay                                                                     | NR              | NR   | 24   | -    | -    | -    | -            |
| Hepatitis C                                                                             | NR              | NR   | NR   | 38   |      |      |              |
| Asymptomatic Bacteriuria in Pregnancy                                                   | NR              | NR   | NR   | NR   | 33   | 48   | -            |
| Asymptomatic Thyroid Dysfunction                                                        | NR              | NR   | NR   | NR   | NR   | 62   | 44           |
| Impaired Vision                                                                         | NR              | NR   | NR   | NR   | 17   | -    | -            |
| Mean awareness score across other CTFPHC guidelines                                     |                 |      |      |      |      |      | <b>36.2%</b> |

-- guideline not evaluated that year



1  
2  
3  
4  
5  
6  
7  
8  
9  
10  
11  
12  
13  
14  
15  
16  
17  
18  
19  
20  
21  
22  
23  
24  
25  
26  
27  
28  
29  
30  
31  
32  
33  
34  
35  
36  
37  
38  
39  
40  
41  
42  
43  
44  
45  
46  
47  
48  
49  
50  
51  
52  
53  
54  
55  
56  
57  
58  
59  
60

Confidential

1  
2  
3  
4  
5  
6  
7  
8  
9  
10  
11  
12  
13  
14  
15  
16  
17  
18  
19  
20  
21  
22  
23  
24  
25  
26  
27  
28  
29  
30  
31  
32  
33  
34  
35  
36  
37  
38  
39  
40  
41  
42  
43  
44  
45  
46  
47

Table 4: Barriers and Facilitators to CTFPHC Guideline Implementation

| Perceived barrier                                                                                                     | Year Barrier Reported |      |      |      |      |      |      |
|-----------------------------------------------------------------------------------------------------------------------|-----------------------|------|------|------|------|------|------|
|                                                                                                                       | 2014                  | 2015 | 2016 | 2017 | 2018 | 2019 | 2020 |
| Misalignment of guideline with patient expectations/preferences                                                       | X                     | X    | X    | X    | X    | X    | X    |
| Misalignment of CTFPHC guideline with other provincial/specialty guidelines                                           | X                     | X    | X    |      | X    | X    | X    |
| Perceptions of evidence strength or lack of consensus among health care professionals about recommendation            | X                     | X    | X    |      | X    | X    | X    |
| Time constraints to implement guideline/ recommendation                                                               | X                     | X    | X    |      |      | X    | X    |
| Complexity of guideline / tool or lack of clarity on how to implement recommendation                                  | X                     |      |      | X    |      | X    | X    |
| Lack of awareness of guideline/ KT tools                                                                              | X                     |      | X    |      |      | X    | X    |
| Misalignment of CTFPHC recommendation and provincial/territorial health care coverage/ fee-for-service billing scheme |                       | X    |      | X    | X    | X    |      |
| Unsure which guideline to follow/use                                                                                  | X                     |      |      |      |      |      |      |
| Guideline out of date/ not recently updated                                                                           |                       |      |      |      | X    |      |      |
| Concern about overlooking a diagnosis                                                                                 |                       | X    |      |      | X    |      |      |
| Unintended outcomes of reduced screening                                                                              |                       |      |      | X    |      |      |      |
| Patient misinformation on screening (sometimes propagated by social media)                                            |                       |      |      | X    |      |      |      |
| Lack of resources to facilitate screening (e.g., limited in northern/remote communities)                              |                       | X    |      |      | X    |      |      |
| Perceived facilitator                                                                                                 | Year Barrier Reported |      |      |      |      |      |      |
|                                                                                                                       | 2014                  | 2015 | 2016 | 2017 | 2018 | 2019 | 2020 |
| Electronic prompts/EMR reminders/ Mobile apps for patients                                                            | X                     | X    | X    |      | X    | X    | X    |
| Availability/awareness of updated guidelines/ tools                                                                   | X                     | X    | X    |      | X    | X    |      |
| Public/patient awareness of guideline recommendations                                                                 | X                     |      |      |      | X    | X    |      |
| Consensus on recommendation among health care practitioners / colleagues                                              | X                     |      |      |      |      | X    |      |
| Financial incentive for screening                                                                                     | X                     |      |      |      |      | X    |      |
| Ease of guideline use                                                                                                 |                       | X    | X    |      | X    | X    |      |
| Strength of guideline evidence                                                                                        |                       | X    |      |      | X    | X    |      |

Box 1: Suggested strategies to facilitate uptake of CTFPHC guidelines

**Strategies to raise patient/public awareness of and buy-in for CTFPHC guidelines**

- Practitioners should
  - aim to discuss screening with patients OR not raise the issue of screening when CTFPHC does not recommend
  - use patient tools to facilitate decision making
- CTFPHC should
  - use media campaigns and build the CTFPHC brand (emphasis on methodology)
  - use media campaigns to orient patients/public to preventive health concepts
  - develop patient-facing tools not tied to a single guideline (e.g., a tool for screening for older adults, people who are pregnant)
  - develop shared decision making tools

**Strategies to raise practitioner awareness/use of CTFPHC guidelines**

- Embed recommendations into EMRs
- Practitioner education on how to assess quality of guideline evidence; emphasize that evidence may evolve over time
- Media campaigns and building the CTFPHC brand (emphasis on methodology)
- Build partnerships with professional organizations to encourage alignment of provincial/territorial and speciality guidelines with the CTFPHC
- Expand dissemination of guidelines and KT tools to practitioners
- Develop tools to support interpretation of conditional recommendations and provide pragmatic guidance on how to implement recommendations
- Ensure guidelines are updated frequently, particularly if another body produces a guideline on the same topic

**Strategies to overcome health system constraints to implement guidelines**

- Try to align health exams with screening intervals, if feasible
- Place printed copies of KT tools in visible locations in the clinic
- Improve involvement of nurse practitioners in screening processes, if feasible

## Appendix A

| Year being evaluated | Year evaluation completed (January to March) | Guidelines evaluated                        | Guideline Publication Date |
|----------------------|----------------------------------------------|---------------------------------------------|----------------------------|
| 2014                 | 2015                                         | Breast Cancer                               | November 2011              |
|                      |                                              | Cervical Cancer                             | January 2013               |
|                      |                                              | Prostate Cancer                             | November 2014              |
| 2015                 | 2016                                         | Breast Cancer                               | November 2011              |
|                      |                                              | Cervical Cancer                             | January 2013               |
|                      |                                              | Prostate Cancer                             | November 2014              |
|                      |                                              | Obesity in Adults                           | February 2015              |
|                      |                                              | Obesity in Children                         | April 2015                 |
| 2016                 | 2017                                         | Breast Cancer                               | November 2011              |
|                      |                                              | Cervical Cancer                             | January 2013               |
|                      |                                              | Prostate Cancer                             | November 2014              |
|                      |                                              | Cognitive Impairment                        | January 2015               |
|                      |                                              | Colorectal Cancer                           | March 2016                 |
|                      |                                              | Lung Cancer                                 | April 2016                 |
|                      |                                              | Developmental Delay                         | May 2016                   |
| 2017                 | 2018                                         | Breast Cancer                               | November 2011              |
|                      |                                              | Cervical Cancer                             | January 2013               |
|                      |                                              | Prostate Cancer                             | November 2014              |
|                      |                                              | Tobacco Smoking in Children and Adolescents | February 2017              |
|                      |                                              | Hepatitis C                                 | April 2017                 |
| 2018                 | 2019                                         | Breast Cancer                               | November 2011              |
|                      |                                              | Cervical Cancer                             | January 2013               |
|                      |                                              | Prostate Cancer                             | November 2014              |
|                      |                                              | Impaired Vision                             | May 2018                   |
|                      |                                              | Asymptomatic Bacteriuria in Pregnancy       | July 2018                  |
|                      |                                              | Breast Cancer Update                        | December 2018              |
| 2019                 | 2020                                         | Cervical Cancer                             | January 2013               |
|                      |                                              | Prostate Cancer                             | November 2014              |
|                      |                                              | Breast Cancer Update                        |                            |
|                      |                                              | Asymptomatic Bacteriuria in Pregnancy       | July 2018                  |
|                      |                                              | Asymptomatic Thyroid Dysfunction            | November 2019              |
| 2020                 | 2021                                         | Cervical Cancer                             | January 2013               |
|                      |                                              | Prostate Cancer                             | November 2014              |
|                      |                                              | Breast Cancer Update                        | December 2018              |

1  
2  
3  
4  
5  
6  
7  
8  
9  
10  
11  
12  
13  
14  
15  
16  
17  
18  
19  
20  
21  
22  
23  
24  
25  
26  
27  
28  
29  
30  
31  
32  
33  
34  
35  
36  
37  
38  
39  
40  
41  
42  
43  
44  
45  
46  
47  
48  
49  
50  
51  
52  
53  
54  
55  
56  
57  
58  
59  
60

|  |  |                                  |               |
|--|--|----------------------------------|---------------|
|  |  | Asymptomatic Thyroid Dysfunction | November 2019 |
|  |  | Esophageal Cancer                | July 2020     |

Confidential

## Appendix B: Task Force Annual Evaluation Interview Script

Note to the interviewer: Before the interview, you will need:

- Summary of the interviewee survey responses about CTFPHC guidelines they know about and use, and their preference for provincial vs. national guidelines
- Summary of CTFPHC recommendation statements

### Intro [~5 min]

Thank you for agreeing to speak with us. My name is [name] and I am a [title] with the Knowledge Translation Program at St. Michael's Hospital in Toronto. We are evaluating the [year] activities of the Canadian Task Force on Preventive Health Care. As part of this evaluation, we are conducting interviews with practitioners about your experiences with the Task Force.

Did you have a chance to review the project information sheet we sent?

The interview will ask you about

- Your knowledge and perceptions of the Task Force
- Your use of Task Force clinical practice guidelines, tools, and resources
- How preventive health care decisions get made
- How preventive health care happens in your practice

Do you have any questions?

*[\*If participant asks for more information: 'The Task Force develops and disseminates evidence-based guidelines on preventive health services for primary care practitioners. The survey you completed, as well as this interview, are a part of the annual evaluation of Task Force 2018 activities, and the feedback you provide will help us to improve the Task Force's impact and identify new opportunities. As a primary care practitioner, we are interested in your knowledge of, and experiences with, the Task Force, how you use guidelines in your practice, as well as what factors influence preventive health care in your practice']*

I will now go over the interview agreement.

- Your participation in this interview is voluntary.
- You can choose not to participate or you may withdraw at any time, even after the interview has started.
- This interview is confidential.
- We will record this interview.
- We will aggregate the survey results. Aggregated results may be included in presentations and publications.
- If you would like a report of the results, we can provide you with a summary when our analysis is complete.

1  
2  
3 Do you have any questions?  
4  
5

6  
7 Do you agree to the interview and to the audio recording?  
8

9 I will now turn on the audio recorder.  
10

11  
12  
13 Today is [date] and I am conducting Task Force [year] evaluation interview number [number].  
14  
15

16  
17 *Note to interviewer: The headings are for your use only. What appears in brackets is the construct from*  
18 *RE-AIM we are targeting with the questions.*  
19

### 20 Introduction to the Task Force (Factors affecting Reach) [~5 -10 min]

- 21 • How did you first learn about the Task Force?  
22 ○ Probes: Were you exposed to the Task Force in medical school or your residency  
23 training? If so, what did they teach?  
24
- 25 • How do you typically hear about new or updated guidelines?  
26 ○  
27

### 28 Experiences with Task Force over time (Effectiveness, factors affecting Adoption) [~5 - 29 10 min ]

30 *(Note to interviewer: For this area of questioning, important to consider survey results – esp. which*  
31 *guidelines they use.)*  
32

- 33 • Describe the extent to which you use/follow recommendations from the Task Force?  
34 ○ Do you intend to change your practice to follow any recommendations from the  
35 Task Force, and if so, how do you intend to change your practice?  
36
- 37 • When did you first start following recommendations from the Task Force? [*\*if they do follow*  
38 *TF guidelines*]
- 39 • Could you describe how you make decisions on which recommendations to use/follow?  
40 ○ Probe: When a new Task Force recommendation comes out, how do you make a  
41 decision on whether or not to follow it?  
42
- 43 • What influences your decision to change your preventive health care practices, such as  
44 screening?  
45 ○ Probe: Can you describe any instances where you changed your practice  
46 because of Task Force recommendations?  
47 ○ Probe: Have you ever started following a Task Force recommendation and then  
48 stopped?  
49 ■ Probe: What made you decide to stop? OR What could make you decide  
50 to stop following a recommendation?  
51

### 52 Guideline decision making (Effectiveness, factors affecting Adoption) [~ 5 – 10 min]

- 53 • From your perspective, where is the main decision-making power for guideline uptake? Who are  
54 the influencers that drive guidelines becoming practice?  
55  
56  
57  
58  
59  
60

- Probe: The practitioner, colleagues, the practice, leaders in the profession, the professional organization, the government, the public?
- What makes a guideline trustworthy?
  - Probes: What are your trusted sources for guidelines?
  - Probe: In your opinion, how does Task Force compare to other sources for guidelines?
  - Probe: Is Task Force trustworthy? Why or why not?
- What makes a guideline easier to implement?
  - Probe: What makes it difficult to implement?
- 
- When you have multiple sources of conflicting information on a preventive health care topic, how do you evaluate which information to follow?
  - Probe: *(Note to interviewer: For this probe, important to consider survey responses.)* Think about a topic where the Task Force and provincial guidelines are different. How did you decide which recommendations to follow?

### Engaging patients (Factors affecting Implementation) [~ 5 – 10 min]

- In your work setting(s), how are patients engaged in discussions about preventive health care? (if at all?)
  - Probe: How do you engage patients in discussions specifically about Task Force recommendations?
  - Probe: (Do you use Task Force KT tools?) How do you use Task Force KT tools?
  -
- In your work setting(s), who else do you think could engage patients in discussions about Task Force recommendations?
  - Probe: How do you think that would work? What support would those people need to engage patients successfully?
  - Probe: Are there any other members of your health care team who engage patients in these discussions?

### Accessing Task Force materials (Suggestions for improving Reach and Implementation) [~5 – 10 min]

- How can the Task Force improve your access to the recommendations and tools?
  - What are the current barriers, if any?
  - What are some recommendations the Task Force could consider to make it easier to access these guidelines/tools?

### Final thoughts and thank you

- Do you have anything else you would like to share?

Thank you so much for taking the time to share with us today. We will be processing and mailing your compensation soon. Please know that the payment processing can take a few weeks. If you have any questions about the evaluation, you can contact [name] at [contact info].
